# Supplementary material
Source: PubMed Central journal article supplement (PMC6150784)
Supplement: NIHMS951458-supplement-Supp_figS1-3.pdf [file NIHMS951458-supplement-Supp_figS1-3.pdf]

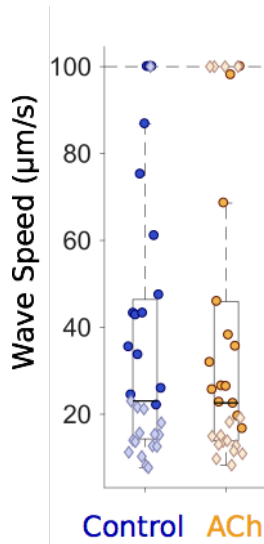

**Supplementary Figure 1: Acetylcholine does not alter the wave speed of zebrafish gut motility.** Wave propagation speeds for 6 dpf control larvae (blue, n=31) and larvae immersed in acetylcholine [ACh; 2.5mg/ml (orange, n=30)]. As larger velocities tend to be unreliable due to the low temporal resolution of our data, measured velocities are capped at a user-defined threshold, given by the dashed line. Each point is derived from a five minute video of a single larva. Darker circles and lighter diamonds represent two independent experiments.

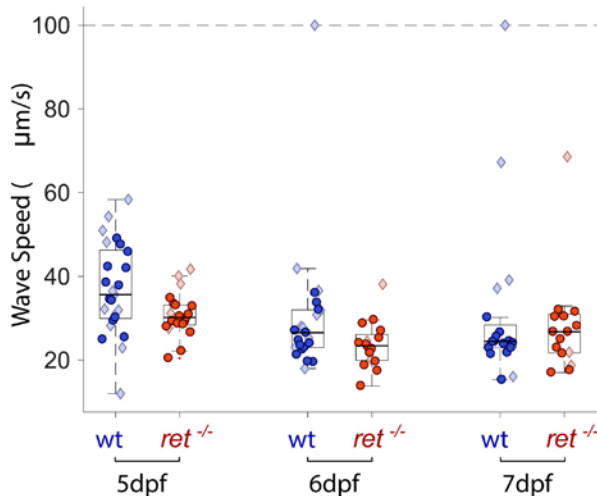

**Supplementary Figure 2: *ret* mutant zebrafish larvae show no noticeable difference in gut motility wave speed compared to wild-type (wt) siblings.** Wave propagation speeds for wt (blue, n=25, 23, 20) and *ret*<sup>-/-</sup> (red, n=21, 16, 16) larvae over three days of development. As larger velocities tend to be unreliable due to the low temporal resolution of our data, measured velocities are capped at a user-defined threshold, given by the dashed line. Each point is derived from a five minute video of a single fish. Darker circles and lighter diamonds represent two independent experiments.

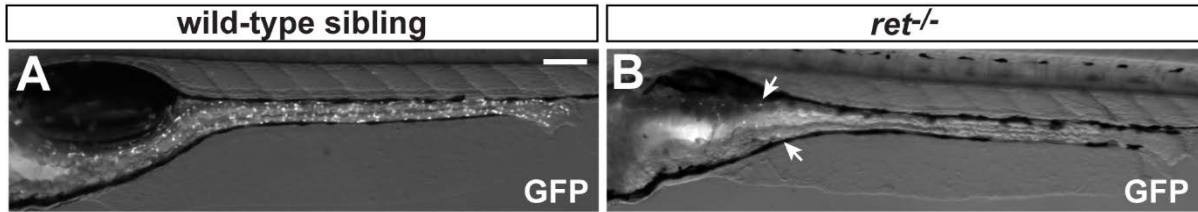

**Supplementary Figure 3: *ret* mutant larvae lack ENS innervation.** Lateral views of 6 dpf sibling larvae, from combined brightfield and fluorescence images. (A) Wild-type larva with ENS neurons expressing GFP driven by the *phox2b* promoter (*phox2b*:GFP) along the entire length of the gut. (B) *ret* mutant larva, which lacks ENS innervation except for a few GFP-positive ENS neurons in the anterior-most part of the gut (arrows). Scale bar = 100 $\mu$ m in A, B.

See file SupplMovie1.avi

**Supplementary Movie 1: Larval gut motility and Particle Image Velocimetry.** (Top) DIC movie of larval zebrafish gut motility with PIV vectors overlaid in red. The magnitude of the vector represents the instantaneous velocity of a small section of the gut and the angle represents the direction it is traveling. Total time: 22 seconds. (Bottom) Averaging the anterior-posterior component of the velocity along the dorsal-ventral direction generates a single curve at each time point. QSTMaps are the surfaces generated by these curves over time.
